# Supplementary material for: The Adaptive Role of Carotenoids and Anthocyanins in Solanum lycopersicum Pigment Mutants under High Irradiance
Source: MDPI journal article supplement (doi:10.3390/cells12212569), 2023-11-03
Supplement: s1 [file s1]

Table S1. Primers for genes.

| №  | Gene Bank ID   | Gene Description                                      | Gene        | Primer 5'-3'          |                          |
|----|----------------|-------------------------------------------------------|-------------|-----------------------|--------------------------|
|    |                |                                                       |             | forward               | reverse                  |
| 1  | NM_001247346.1 | Damage DNA binding protein 1                          | <i>DDB1</i> | ACTACGTGGTTACGGCTCAC  | TGGCACATCTAACATAGGCTGTAA |
| 2  | NM_001374394.1 | Anthocyanidin synthase                                | <i>ANS</i>  | TCTCAATTCCCACCTCGCAC  | ACTTTGCGCTCAGCAAGAAC     |
| 3  | NM_001247883.2 | Phytoene synthase                                     | <i>PSY</i>  | CTCCATCTGGAGAACGGACG  | CAACAAGCCCAAATTCCCCG     |
| 4  | NM_001247104.2 | Chalcone synthase                                     | <i>CHS</i>  | CCGTGAACCCAGTGAATCTC  | CTCACGTAGGTGTCCGTCAAT    |
| 5  | NM_001247891.2 | Transcription factor elongated hypocotyl 5            | <i>HY5</i>  | AAGCTCAACCATCAGCTGGG  | CCTTCACCCTTGCTTCCAGA     |
| 6  | NM_001308008.1 | Transcription factor phytochrome interacting factor 4 | <i>PIF4</i> | GAGTTGTTGTGGCGAAACGG  | TAGCCACGCGACAGTTTCAT     |
| 7  | NM_001247118.2 | E3 ubiquitin-protein ligase                           | <i>COP1</i> | TGAACCTGCAGATGCACACT  | AATCAAACTCCAAGCCCGT      |
| 8  | XM_004249510.4 | Phenylalanine ammonia-lyase 1                         | <i>PAL1</i> | TGCAGTCCAACCTACCCTTT  | ATTCGTCCTCGAAAGCTCCA     |
| 9  | XM_004242121.4 | Flavonol synthase                                     | <i>FLS</i>  | CGACAGAAGCTGGGATTTCCT | GGATCCATTGCGCGTCCTTT     |
| 10 | NM_001247219.2 | De-etiolated1                                         | <i>DET1</i> | AAGCTGGCAGCACAGATGG   | CTGATGCCTGCAGAAACAAGG    |
| 11 | A0A3Q7F8W6     | Tubulin alpha chain                                   | <i>TUB1</i> | ACAACCTTGCCCGTGGACAT  | TGCTCAAGAAGGGAGTGGGT     |
